# Supplementary material for: A microstructure-composition map of a ternary liquid/liquid/particle system with partially-wetting particles
Source: Royal Society of Chemistry journal article supplement (doi:10.1039/c7sm01571b), 2017-01-01
Supplement: c7sm01571b1.pdf [file c7sm01571b1.pdf]

## Supplementary material to “A microstructure-composition map of a ternary liquid/liquid/particle system with partially-wetting particles”

Junyi Yang<sup>1</sup>, David Roell<sup>2</sup>, Martin Echavarria<sup>1</sup> and Sachin S. Velankar<sup>1,3,\*</sup>

<sup>1</sup> Dept. of Chemical and Petroleum Engineering, University of Pittsburgh, Pittsburgh PA 15260

<sup>2</sup> Dept. of Plastics Engineering, Penn State Erie, Erie PA 16563

<sup>3</sup> Dept. of Mechanical Engineering and Materials Science, University of Pittsburgh, Pittsburgh PA 15260

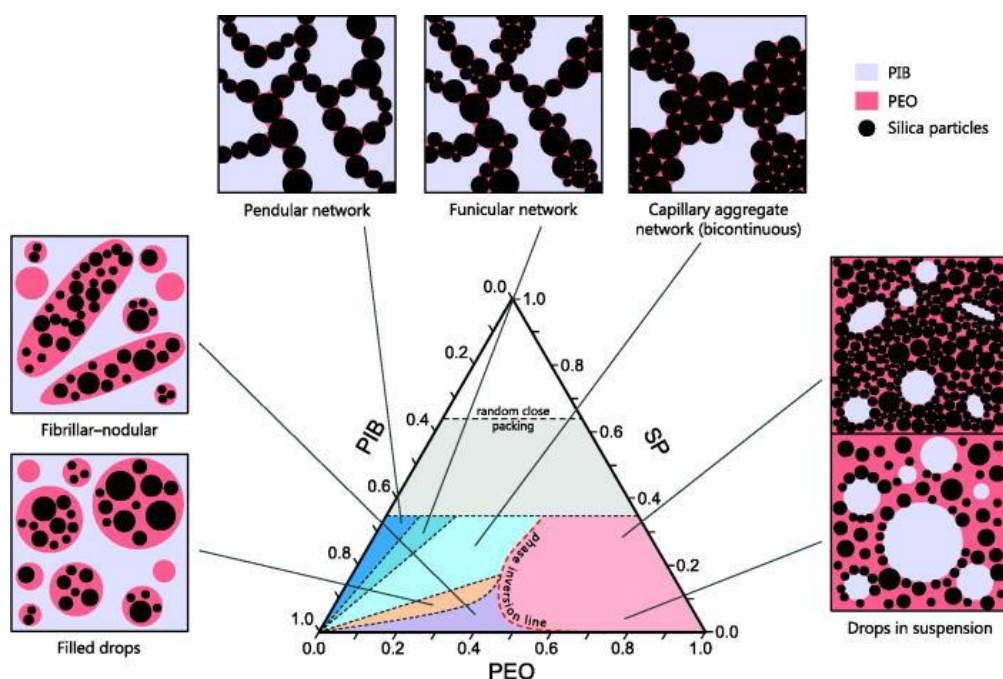

Figure S1. Morphological map and schematic structures of the investigated PIB/PEO/fully wettable silica ternary system. The ternary composition diagram is based on volume fractions. The red dashed path in the ternary diagram represents the phase inversion boundary, with the liquid continuous phase being PIB (non-wetting phase) on the left-hand side and PEO (wetting phase) on the right-hand side. The grey region of the ternary diagram corresponds to high particle concentrations, which was not explored. Figure reproduced from T. Domenech and S. S. Velankar, *J. Rheol.*, 2017, 61, 363-377. with permission.

\* Corresponding author, velankar@pitt.edu

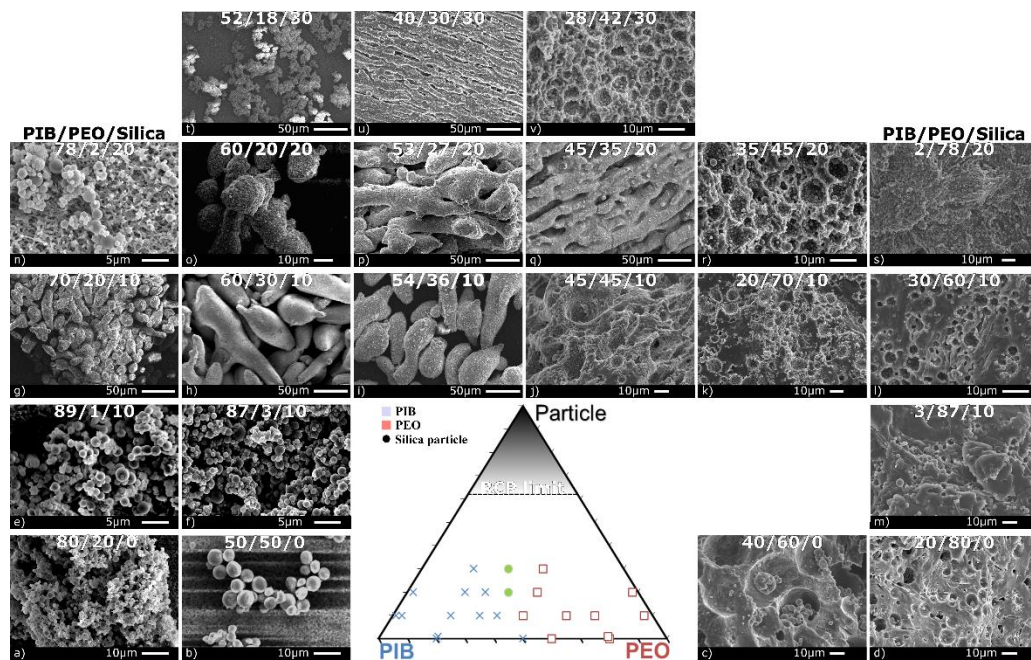

Figure S2. Summary of scanning microscope images at all compositions which are labelled in the pictures separately. The compositions, all listed in the form of PIB/PEO/silica, are as follows: (a) 80/20/00; (b) 50/50/0; (c) 40/60/0; (d) 20/80/0; (e) 89/1/10; (f) 87/3/10; (g) 70/20/10; (h) 60/30/10. (i) 54/36/10; (j) 45/45/10; (k) 20/70/10; (l) 30/60/10 (m) 3/87/10. (n) 78/2/20; (o) 60/20/20. (p) 53/27/20; (q) 45/35/20; (r) 35/45/20; (s) 2/78/20; (t) 52/18/30. (u) 40/30/30; (v) 28/42/30; \*sign refers to Figure 2c&d where the difference of addition partial wet particles is shown.
